# Supplementary material for: Primary Total Prostate Cryoablation for Localized High-Risk Prostate Cancer: 10-Year Outcomes and Nomograms
Source: MDPI journal article supplement (doi:10.3390/cancers15153873), 2023-07-30
Supplement: s1 [file s1]

## Supplementary materials

**Supplementary Figure S1.** Flow diagram of patient selection into the study cohort

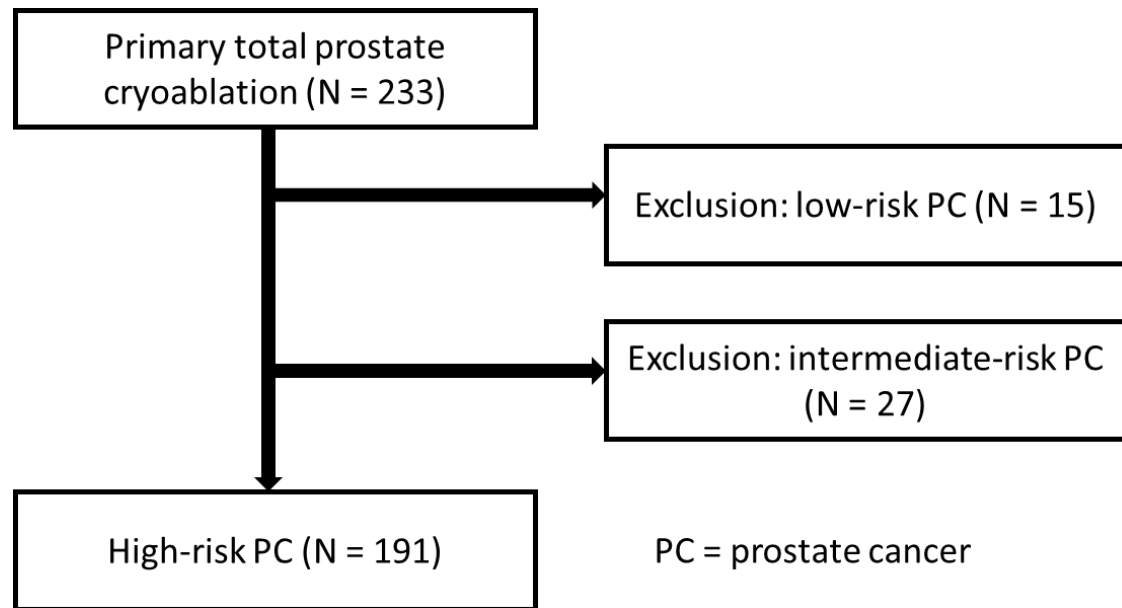

**Supplementary Table S1.** Demographics and characteristics of the training and validation cohorts

| Variables                         | All         |        | Training cohort |        | Validation cohort |        | <i>p</i> value |
|-----------------------------------|-------------|--------|-----------------|--------|-------------------|--------|----------------|
| Patient number (n)                | 191         | 100%   | 153             | 80.1%  | 38                | 19.90% |                |
| Mean age (years, SD)              | 70.3 (7.5)  |        | 70.3 (7.6)      |        | 70.3 (7.0)        |        | 0.955          |
| Mean PSA at diagnosis (ng/ml, SD) | 15.4 (10.1) |        | 15.7 (10.4)     |        | 14.2 (8.8)        |        | 0.419          |
| PSA at diagnosis (ng/ml)          |             |        |                 |        |                   |        | 0.352          |
| <10                               | 77          | 40.31% | 59              | 38.56% | 18                | 47.37% |                |
| 10-20                             | 64          | 33.51% | 55              | 35.95% | 9                 | 23.68% |                |
| >20                               | 50          | 26.18% | 39              | 25.49% | 11                | 28.95% |                |
| Gleason sum                       |             |        |                 |        |                   |        | 0.838          |
| ~6                                | 35          | 18.32% | 27              | 17.65% | 8                 | 21.05% |                |
| 3+4=7                             | 61          | 31.94% | 50              | 32.68% | 11                | 28.95% |                |
| 4+3=7                             | 43          | 22.51% | 33              | 21.57% | 10                | 26.32% |                |
| 8-10                              | 52          | 27.23% | 43              | 28.10% | 9                 | 23.68% |                |
| Clinical T stage                  |             |        |                 |        |                   |        | 0.916          |
| T1-2                              | 49          | 25.65% | 40              | 26.14% | 9                 | 23.68% |                |
| T3a                               | 80          | 41.88% | 63              | 41.18% | 17                | 44.74% |                |
| T3b-4                             | 62          | 32.46% | 50              | 32.68% | 12                | 31.58% |                |

|                                       |             |        |             |         |            |        |       |
|---------------------------------------|-------------|--------|-------------|---------|------------|--------|-------|
| Visible lesions on MRI                |             |        |             |         |            |        | 0.758 |
| No                                    | 32          | 16.75% | 25          | 16.34%  | 7          | 18.42% |       |
| Yes                                   | 159         | 83.25% | 128         | 83.66%  | 31         | 81.58% |       |
| Anterior apical tumor                 |             |        |             |         |            |        | 0.907 |
| No                                    | 162         | 84.82% | 130         | 84.97%  | 32         | 84.21% |       |
| Yes                                   | 29          | 15.18% | 23          | 15.03%  | 6          | 15.79% |       |
| Neoadjuvant hormonal therapy          |             |        |             |         |            |        | 0.362 |
| No                                    | 88          | 46.07% | 73          | 47.71%  | 15         | 39.47% |       |
| Yes                                   | 103         | 53.93% | 80          | 52.29%  | 23         | 60.53% |       |
| Adjuvant hormonal therapy             |             |        |             |         |            |        | 0.546 |
| No                                    | 171         | 89.53% | 138         | 124.32% | 33         | 41.25% |       |
| Yes                                   | 20          | 10.47% | 15          | 13.51%  | 5          | 6.25%  |       |
| Prostate volume (median in mL, range) | 29.9 (12.4) |        | 30.6 (12.9) |         | 27.1 (9.4) |        | 0.126 |
| Cryoprobe number (median, range)      | 6.7 (1.0)   |        | 6.8 (1.0)   |         | 6.6 (1.0)  |        | 0.414 |
| PSA nadir value (ng/mL)               |             |        |             |         |            |        | 0.388 |
| <0.01                                 | 87          | 45.55% | 72          | 47.06%  | 15         | 39.47% |       |
| 0.01-<0.1                             | 66          | 34.55% | 51          | 33.33%  | 15         | 39.47% |       |
| 0.1-<0.5                              | 27          | 14.14% | 23          | 15.03%  | 4          | 10.53% |       |
| 0.5~                                  | 11          | 5.76%  | 7           | 4.58%   | 4          | 10.53% |       |
| Time to PSA nadir (weeks)             |             |        |             |         |            |        | 0.579 |
| <8                                    | 71          | 37.17% | 57          | 37.25%  | 14         | 36.84% |       |
| 8-<12                                 | 76          | 39.79% | 63          | 41.18%  | 13         | 34.21% |       |
| 12~                                   | 44          | 23.04% | 33          | 21.57%  | 11         | 28.95% |       |

**Supplementary Table S2.** The association of PSA nadir value and time to PSA nadir

| Time to PSA nadir (months) | PSA nadir value (ng/mL) |            |            |             | <i>p</i> <0.001 |
|----------------------------|-------------------------|------------|------------|-------------|-----------------|
|                            | <0.01                   | 0.01~<0.1  | 0.1~<0.5   | 0.5 or more |                 |
| < 2                        | 17 (23.9%)              | 26 (36.6%) | 21 (29.6%) | 7 (9.9%)    |                 |
| 2-< 3                      | 40 (52.6%)              | 31 (40.8%) | 2 (2.6%)   | 3 (3.9%)    |                 |
| 3 or more                  | 30 (68.2%)              | 9 (20.5%)  | 4 (9.1%)   | 1 (2.3%)    |                 |

**Supplementary Table S3.** The association of PSA nadir value and neoadjuvant hormonal therapy

| Neoadjuvant<br>hormonal therapy | PSA nadir value (ng/mL) |            |            |             |           |
|---------------------------------|-------------------------|------------|------------|-------------|-----------|
|                                 | <0.01                   | 0.01~<0.1  | 0.1~<0.5   | 0.5 or more |           |
| No                              | 37 (42.1%)              | 35 (39.8%) | 12 (13.6%) | 4 (4.6%)    | p = 0.538 |
| Yes                             | 50 (48.5%)              | 31 (30.1%) | 15 (15.6%) | 7 (6.8%)    |           |
| All                             | 86 (45.0%)              | 67 (35.1%) | 27 (14.1%) | 11 (5.8%)   |           |

PSA = prostate-specific antigen
